1 **CCSN: Single Cell RNA Sequencing Data Analysis by**

2 **Conditional Cell-specific Network**

3 **Lin Li<sup>1,#,a</sup>, Hao Dai<sup>1,2,#,b</sup>, Zhaoyuan Fang<sup>1,\*,c</sup>, Luonan Chen<sup>1,2,3,4,\*,d</sup>**

4• *<sup>1</sup>Key Laboratory of Systems Biology, CAS Center for Excellence in Molecular Cell*  
5 *Science, Institute of Biochemistry and Cell Biology, Shanghai Institutes for Biological*  
6 *Sciences, Chinese Academy of Sciences, University of Chinese Academy of Sciences,*  
7 *Shanghai, 200031, China*

8• *<sup>2</sup>Shanghai Research Center for Brain Science and Brain-Inspired Intelligence,*  
9 *Shanghai, 201210, China*

10• *<sup>3</sup>CAS Center for Excellence in Animal Evolution and Genetics, Chinese Academy of*  
11 *Sciences, Kunming, 650223, China*

12• *<sup>4</sup>School of Life Science and Technology, ShanghaiTech University, Shanghai, 201210,*  
13 *China*

14•

15• *\*To whom correspondence should be addressed.*

16• *E-mail: [lnchen@sibs.ac.cn](mailto:lnchen@sibs.ac.cn) (Luonan Chen), [fangzhaoyuan@sibs.ac.cn](mailto:fangzhaoyuan@sibs.ac.cn) (Zhaoyuan*  
17 *Fang).*

18•

19• *#These authors contributed equally to this paper as the first authors.*

20

21

22

23

## 24 **Abstract**

25 The rapid advancement of single cell technologies has shed new light on the complex  
26 mechanisms of cellular heterogeneity. However, compared with bulk RNA sequencing  
27 (RNA-seq), single-cell RNA-seq (scRNA-seq) suffers from higher noise and lower  
28 coverage, which brings new computational difficulties. Based on statistical  
29 independence, cell-specific network (CSN) is able to quantify the overall associations  
30 between genes for each cell, yet suffering from a problem of overestimation related to  
31 indirect effects. To overcome this problem, we propose the “conditional cell-specific  
32 network” (CCSN) method, which can measure the direct associations between genes  
33 by eliminating the indirect associations. CCSN can be used for cell clustering and  
34 dimension reduction on a network basis of single cells. Intuitively, each CCSN can be  
35 viewed as the transformation from less “reliable” gene expression to more “reliable”  
36 gene-gene associations in a cell. Based on CCSN, we further design network flow  
37 entropy (NFE) to estimate the differentiation potency of a single cell. A number of  
38 scRNA-seq datasets were used to demonstrate the advantages of our approach: (1) one  
39 direct association network for one cell; (2) most existing scRNA-seq methods designed  
40 for gene expression matrices are also applicable to CCSN-transformed degree matrices;  
41 (3) CCSN-based NFE helps resolving the direction of differentiation trajectories by  
42 quantifying the potency of each cell. CCSN is publicly available at  
43 <http://sysbio.sibcb.ac.cn/cb/chenlab/soft/CCSN.zip>.

44

45

46 **KEYWORDS:** Single cell analysis; Network flow entropy; Cell-specific network;  
47 Single cell network; Direct association; Conditional independence

48

## 49 **Introduction**

50 With the development of high-throughput single-cell RNA sequencing (scRNA-seq),  
51 novel cell populations in complex tissues [1-5] can be identified and the differentiation  
52 trajectory of cell states [6-8] can be obtained, which opens a new way to understand the  
53 heterogeneity and transition of cells [9-11]. However, compared to traditional bulk  
54 RNA-seq data, the prevalence of high technical noise and dropout events is a major  
55 problem in scRNA-seq [12-17], which raises substantial challenges for data analysis.  
56 Many computational methods were proposed to improve the identification of new cell  
57 types [18-21]. Meanwhile, imputation is an effective strategy to transform the dropouts  
58 to the substituted values [22-26]. However, most of these methods mainly analyze  
59 mRNA expression/concentrations, while the information of gene-gene interactions (or  
60 their network) is ignored.

61 Recently, a network-based method, cell-specific network (CSN), was proposed to  
62 perform network analysis for scRNA-seq data [27], which elegantly infers a network  
63 for each cell and successfully transforms the noisy and “unreliable” gene expression  
64 data to the more “reliable” gene association data. The network degree matrix (NDM)  
65 derived from CSN can be further applied in downstream single cell analyses, which  
66 performs better than traditional expression-based methods in terms of robustness and  
67 accuracy. CSN is able to identify the dependency between two genes from single-cell  
68 data based on statistical independence. However, CSN suffers from a problem of  
69 overestimation on gene-gene associations, which include both direct and indirect  
70 associations due to interactive effects from other genes in a network. In other words, a  
71 gene pair without direct association can be falsely identified to have a link just because  
72 they both have true associations with some other genes. Thus, the gene-gene network  
73 of a cell constructed by CSN may be much denser than the real molecular network in

74 this cell, in particular when there are many complex associations among genes.

75 To overcome this shortcoming of CSN, we introduce a novel computational method  
76 to construct a conditional cell-specific network (CCSN) from scRNA-seq data.  
77 Specifically, CCSN identifies direct associations between genes by filtering out indirect  
78 associations in the gene-gene network based on conditional independence. Thus, CCSN  
79 can transform the original gene expression data of each cell to the direct and robust  
80 gene-gene association data (or network data) of the same cell. In this paper, we first  
81 demonstrate that the transformed gene-gene association data not only are fully  
82 compatible with traditional analyses such as dimension reduction and clustering, but  
83 also enable us to delineate the cell-specific network topology and its dynamics along  
84 developmental trajectories. Then, by defining the network flow entropy (NFE) on the  
85 gene-gene association data of each cell based on CCSN, we estimate the differentiation  
86 potency of individual cells. We show that NFE can illustrate the lineage dynamics of  
87 cell differentiation by quantifying the differentiation potency of cells, which is also one  
88 of the most challenging tasks in developmental biology.

89

## 90 **Methods**

91 Assuming that  $x$  and  $y$  are two random variables, and  $z$  is the third random variable. If  
92  $x$  and  $y$  are independent, then

$$93 \quad p(x)p(y) = p(x, y) \quad (1)$$

94 where  $p(x, y)$  is the joint probability distribution of  $x$  and  $y$ ;  $p(x)$  and  $p(y)$  are the  
95 marginal probability distributions of  $x$  and  $y$ .

96 If  $x$  and  $y$  with the condition  $z$  are conditionally independent, then

$$97 \quad p(x|z)p(y|z) = p(x, y|z) \quad (2)$$

98 where  $p(x, y|z)$  is the joint probability distribution of  $x$  and  $y$  with the condition  $z$ ,

99  $p(x|z)$  and  $p(y|z)$  are conditionally marginal probability distributions. Note that  
100 eqns. (1)-(2) are both necessary and sufficient conditions on mutual independence and  
101 conditional independence, respectively.

102 Here we define

$$103 \quad \rho_{xy} = p(x, y) - p(x)p(y). \quad (3)$$

$$104 \quad \rho_{xy|z} = p(x, y|z) - p(x|z)p(y|z). \quad (4)$$

105 The original CSN method [27] uses  $\rho_{xy}$  to distinguish the independency and  
106 association between  $x$  and  $y$  (File S1 Note 1). However, if two independent variables  $x$   
107 and  $y$  are both associated with a third random variable  $z$ ,  $\rho_{xy}$  cannot measure the direct  
108 independency because there is an indirect association between  $x$  and  $y$ . In other words,  
109 the associations defined by CSN or eqn. (3) include both direct and indirect dependency,  
110 thus resulting in the overestimation on gene-gene associations. To overcome this  
111 problem of CSN, we develop a novel method, conditional cell-specific network  
112 (CCSN), which measures the direct gene-gene associations based on the conditional  
113 independency  $\rho_{xy|z}$ , i.e. eqn. (4), by filtering out the indirect associations in the  
114 reconstructed network. The computational framework of CCSN is shown in **Figure 1**,  
115 and is described in the next sections.

## 116 **Probability distribution estimation**

117 We numerically estimate the value of  $\rho_{xy|z}$  by making a scatter diagram based on gene  
118 expression data. Suppose there are  $m$  genes and  $n$  cells in the data. We depict the  
119 expression values of gene  $x$ , gene  $y$  and the conditional gene  $z$  in a three-dimensional  
120 space (Figure S1 A-G), where each dot represents one cell. First, we draw two parallel  
121 planes which are orthogonal with  $z$  axis near the dot  $k$  to represent the upper and lower  
122 bounds of the neighborhoods of  $z_k$ . And the number of dots in the space between the

123 two parallel planes (i.e. the neighborhood of  $z_k$ ) is  $n_z^{(k)}$  (Figure S1 D). Now we get a  
 124 subspace on condition of gene  $z$ . Then, we draw other four planes near the dot  $k$ , where  
 125 two planes are orthogonal with  $x$  axis and the other two planes are orthogonal with  $y$   
 126 axis. We can get the neighborhoods of  $(x_k, z_k)$ ,  $(y_k, z_k)$  and  $(x_k, y_k, z_k)$  according  
 127 to the intersection space of six planes (Figure S1 E-G), where the numbers of dots  
 128 are  $n_{xz}^{(k)}$ ,  $n_{yz}^{(k)}$  and  $n_{xyz}^{(k)}$ , respectively. Then, we can get the estimation of probability  
 129 distributions:

$$130 \quad p^{(k)}(x, y|z) \approx \frac{n_{xyz}^{(k)}}{n_z^{(k)}}, \quad p^{(k)}(x|z) \approx \frac{n_{xz}^{(k)}}{n_z^{(k)}}, \quad p^{(k)}(y|z) \approx \frac{n_{yz}^{(k)}}{n_z^{(k)}}$$

131 Based on eqn. (4), we construct a statistic

$$132 \quad \rho_{xy|z}^{(k)} = \frac{n_{xyz}^{(k)}}{n_z^{(k)}} - \frac{n_{xz}^{(k)} n_{yz}^{(k)}}{n_z^{(k)^2}} \quad (5)$$

133 to measure the conditional independence between gene  $x$  and gene  $y$  on the condition  
 134 of gene  $z$  in cell  $k$ . And when gene  $x$  and gene  $y$  given gene  $z$  are conditionally  
 135 independent, the expectation  $\mu_{xy|z}^{(k)}$  and standard deviation  $\sigma_{xy|z}^{(k)}$  (File S1) of the  
 136 statistic  $\rho_{xy|z}^{(k)}$  can be obtained:

$$137 \quad \mu_{xy|z}^{(k)} = 0$$

$$138 \quad \sigma_{xy|z}^{(k)} = \sqrt{\frac{n_{xz}^{(k)} n_{yz}^{(k)} \cdot (n_z^{(k)} - n_{xz}^{(k)}) \cdot (n_z^{(k)} - n_{yz}^{(k)})}{n_z^{(k)^4} (n_z^{(k)} - 1)}}$$

139 Then, we normalize the statistic as

$$\hat{\rho}_{xy|z}^{(k)} = \frac{\rho_{xy|z}^{(k)} - \mu_{xy|z}^{(k)}}{\sigma_{xy|z}^{(k)}} \quad (6)$$

140 If gene  $x$  and  $y$  are conditionally independent on the condition of gene  $z$ , it can be proved  
 141 that the normalized statistic follows the standard normal distribution (File S1 Note 1

142 and Figure S2), and it is less than or equal to 0 when gene  $x$  and  $y$  are conditionally  
143 independent (File S1 Note 2).

144

### 145 **Constructing conditional cell-specific network for each cell**

146 To estimate the conditional independency of gene  $x$  and gene  $y$  given the conditional  
147 gene  $z$  in cell  $k$ , we use the following hypothesis test:

148  $H_0$  (*null hypothesis*): gene  $x$  and gene  $y$  are conditionally independent given gene  $z$  in  
149 cell  $k$ .

150  $H_1$  (*alternative hypothesis*): gene  $x$  and gene  $y$  are conditionally dependent given  
151 gene  $z$  in cell  $k$ .

152 If  $\hat{\rho}_{xy|z}^{(k)}$ , the normalized statistic, is larger than  $\mathcal{N}_\alpha$  (significance level  $\alpha$ ,  $\mathcal{N}_\alpha$  is the  
153 alpha quantile of the standard normal distribution), the null hypothesis will be rejected  
154 and then  $\omega_{xy|z}^{(k)} = 1$  ( $\omega_{xy|z}^{(k)}$  is the edge weight of genes  $x$  and  $y$  on condition of gene  $z$ ).

$$\omega_{xy|z}^{(k)} = \begin{cases} 1 & \text{gene } x \text{ and } y \text{ are directly dependent given gene } z \\ 0 & \text{gene } x \text{ and } y \text{ are conditionally independent given gene } z \end{cases} \quad (7)$$

155 All gene pairs can be tested if they are conditionally independent given gene  $z$  in cell  
156  $k$ . And the conditional cell-specific network (CCSN)  $C_z^{(k)}$  given conditional gene  $z$  is  
157 obtained for cell  $k$ .

158 Then, to estimate the direct association between a pair of genes in a cell,  
159 theoretically we should use all the remaining  $m-2$  genes as conditional genes, which is  
160 computationally intensive. Suppose there are  $m$  genes in our analysis, then  $m*(m-1)/2$   
161 gene pairs should be tested. Fortunately, a molecular network is generally sparse, which  
162 means that a pair of genes (i.e. genes  $x$  and  $y$ ) are expected to have a very small number  
163 of commonly interactive genes (as conditional genes  $z$ ). In other words, numerically we  
164 can use a small number of conditional genes to identify the direct association between

165 a pair of genes in a cell, which can significantly reduce the computational cost (File S1  
166 Note 3, Table S1). For each gene pair in a cell, we choose  $G$  ( $1 \leq G \leq m-2$ ) genes as the  
167 conditional genes to test if the gene pair is conditionally independent or not. Generally,  
168 the conditional genes may be the key regulatory genes in a biological process, such as  
169 transcription factors and kinases. From a network viewpoint, these genes are usually  
170 hub genes in the gene-gene network, and the network degrees of these genes would be  
171 higher.

172 Practically, the conditional genes could be obtained from many available methods,  
173 such as highly expressed genes, highly variable genes, key transcription factor genes,  
174 or the hub genes in the CSN, and so on. For the CCSN method, the conditional gene  
175 sets were defined by CSN. The following two steps were used to obtain the conditional  
176 genes although other appropriate schemes can also be used:

177 1. For a given cell, we first construct a CSN without the consideration of conditional  
178 genes, where the edge between gene  $x$  and gene  $y$  in cell  $k$  is determined by the  
179 following hypothesis test:

180  $H_0$ (*null hypothesis*): gene  $x$  and gene  $y$  are independent in cell  $k$ .

181  $H_1$ (*alternative hypothesis*): gene  $x$  and gene  $y$  are dependent in cell  $k$ .

182 The statistic  $\rho_{xy}$  can be used to measure the independency of genes  $x$  and  $y$  (File S1  
183 Note1). If  $\rho_{xy}$  is larger than a significant level, we will reject the null hypothesis and  
184  $\text{edge}_{xy}(k) = 1$ , otherwise  $\text{edge}_{xy}(k) = 0$ .

$$185 \quad \text{edge}_{xy}^{(k)} = \begin{cases} 1 & \text{gene } x \text{ and } y \text{ are dependent} \\ 0 & \text{gene } x \text{ and } y \text{ are independent} \end{cases}$$

186 Then we use  $D_z^{(k)}$  to measure the importance of conditional gene  $z$  in cell  $k$ :

$$D_z^{(k)} = \sum_{y=1, y \neq z}^M \text{edge}_{zy}^{(k)} \quad (8)$$

187 Eqn. (8) means that if a gene is connected to more other genes, this gene is more  
188 important.



189 2. For a given cell  $k$ , we choose the top  $G$  ( $G \geq 1$ ) largest ‘importance’ genes as the  
190 conditional genes.

191 We assume that the conditional gene set is  $\{z_g, g = 1, 2, 3, \dots, G\}$ , and the  
192 conditional cell-specific network (CCSN)  $C_{z_g}^{(k)}$  is obtained for cell  $k$  given conditional  
193 gene  $z_g$ . The CCSNs of the cell  $k$  on the condition of gene set  $\{z_g, g = 1, 2, 3, \dots, G\}$   
194 are  $\{C_{z_1}^{(k)}, C_{z_2}^{(k)}, \dots, C_{z_G}^{(k)}\}$ . Then, we use

$$195 \quad \bar{C}_k = \frac{1}{G} \sum_{g=1}^G C_{z_g}^{(k)} = \left( c_{ij}^{(k)} \right) \quad (9)$$

196 to represent the degrees of gene-gene interaction network of cell  $k$ , where  $c_{ij}^{(k)}$  for  
197  $i, j = 1, \dots, m$  is the  $(i, j)$  element of the matrix  $\bar{C}_k$ .

198 For scRNA-seq data with all  $n$  cells, we can construct  $n$  CCSNs, which can be used  
199 for further dimension reduction and clustering. In other words, instead of the originally  
200 measured gene expression data with  $n$  cells, we use the  $n$  transformed CCSNs for further  
201 analysis. In addition, each CCSN is a network for a cell, which can be used for network  
202 analysis (gene regulations and network biomarkers) on the basis of a single cell.

### 203 **Network degree matrix from CCSN**

204 CCSNs could be used for various biological studies by exploiting the gene-gene  
205 conditional association network from a network viewpoint. We transform eqn. (9) to a  
206 conditional network degree vector based on the following transformation

$$207 \quad v_{ik} = \sum_{j=1}^m c_{ij}^{(k)} \quad (10)$$

208 Then, for  $\{\bar{C}_1, \bar{C}_2, \dots, \bar{C}_n\}$ , an  $m \times n$  matrix CNDM is obtained.

$$209 \quad \text{CNDM} = (v_{ik}) \quad \text{with } i = 1, \dots, m; k = 1, \dots, n \quad (11)$$

210 The matrix has the same dimension with the gene expression matrix (GEM), i.e.  
211  $\text{GEM} = (x_{ik})$  with  $i = 1, \dots, m; k = 1, \dots, n$ , but CNDM can reflect the gene-gene

212 direct association in terms of interaction degrees. Moreover, this CNDM matrix after  
213 normalization could be further analyzed by most traditional scRNA-seq methods for  
214 dimension reduction and clustering analysis. The input/output settings as well as  
215 application fields of our CCSN method are listed in File S1 Note 4.

## 216 **Network analysis of CCSN**

217 The relationship between gene pairs can be obtained by CCSN at a single cell level.  
218 CCSN also provides a new way to build gene-gene interaction network for each cell.  
219 And the CNDM derived from CCSN can be further used in dimension reduction,  
220 clustering and network flow entropy analysis by many existing methods.

### 221 *Dimension reduction*

222 We used principal component analysis (PCA) [28] and t-distributed stochastic neighbor  
223 embedding (t-SNE) [29] which respectively represent linear and nonlinear methods, to  
224 perform dimension reduction on public scRNA-seq datasets with known cell types.

### 225 *Clustering*

226 To validate the good performance of CCSN in clustering analysis, several traditional  
227 clustering methods such as K-means, Hierarchical cluster analysis, and K-medoids  
228 were applied to clustering analysis. Furthermore, state-of-the-art scRNA-seq data  
229 clustering methods such as SC3, SIMLR and Seurat [20, 30, 31] were also used for  
230 comparison.

### 231 *Network flow entropy analysis.*

232 Quantifying the differentiation potency of a single cell is one of the important tasks in  
233 scRNA-seq studies [15, 32, 33]. A recent study developed SCENT [34], which uses  
234 protein-protein interaction (PPI) network and gene expression data as input to obtain  
235 the potency of cells. However, SCENT depends on the PPI network, which may ignore  
236 many important relationships between genes in specific cells. In this paper, we

237 developed network flow entropy (NFE) to estimate the differentiation potency of a cell  
238 from its CSN or CCSN network, which is constructed for each cell. The normalized  
239 gene expression profile and CSN/CCSN is used when we compute the network flow  
240 entropy.

241 Estimating NFE requires a background network, which could be provided by CSN  
242 or CCSN. Based on CSN or CCSN, we could know whether or not there is an edge  
243 between gene  $i$  and gene  $j$ . We assume that the weight of an edge between gene  $i$  and  
244 gene  $j$ ,  $p_{ij}$  is proportional to the normalized expression levels of gene  $i$  and gene  $j$ , that  
245 is  $p_{ij} \propto x_i x_j$  with  $\sum_{j=1}^m p_{ij} = 1$ . These weights are interpreted as interaction  
246 probabilities. Then, we normalize the weighted network as a stochastic matrix,  $P=(p_{ij})$   
247 with

$$248 \quad p_{ij} = \frac{x_j}{\sum_{k \in E(i)} x_k} = \frac{x_j}{(Ax)_i} \quad \text{for } i, j=1, \dots, m$$

249 where  $E(i)$  contains the neighbours of gene  $i$ , and  $A$  is the CSN or CCSN ( $A_{ij} = 1$  if  
250  $i$  and  $j$  are connected, otherwise  $A_{ij} = 0$ ).

251 And then, we define the NFE as:

$$252 \quad \text{NFE} = -\sum_{i,j} x_i p_{ij} \log(x_i p_{ij}) \quad (12)$$

253 where  $x_i$  is the normalized gene expression of gene  $i$ . From the definition, NFE is  
254 clearly different from network entropy.

255

## 256 **Data availability**

257 Twelve scRNA-seq datasets and one bulk RNA-seq dataset [15, 35-41] were used to  
258 validate our CCSN method. The numbers of cells in these datasets range from 100 to  
259 20,000. Table S2 gives a brief introduction of these datasets.

260

## 261 **Results**

### 262 **Visualization and clustering of scRNA-seq datasets with CNDM**

263 Characterizing the cell heterogeneity is one of the important tasks for scRNA-seq data  
264 analysis. To test whether CCSN-transformed network data can help segregate cell types,  
265 we performed dimension reduction and clustering on the CNDMs of gold-standard  
266 scRNA-seq datasets, using algorithms widely employed in scRNA-seq studies. The  
267 numbers of conditional genes used in CCSN construction were listed in Table S2.

268 For visualizing the structure of these datasets in a two-dimensional space, we used  
269 the representative linear and nonlinear dimension reduction methods, principle  
270 component analysis (PCA) [42] and t-distributed stochastic neighbor embedding (t-  
271 SNE) [29], respectively. As shown in **Figure 2** and Figure S3, CNDMs can separate  
272 different cell types clearly in the low-dimensional space by both PCA and t-SNE.  
273 Notably, they generally perform even better than GEM (Figure 2, Figure S3). Hence,  
274 the network data of CNDMs contain sufficient information for separating cell types in  
275 scRNA-seq datasets.

276 To quantitatively evaluate the power of CNDMs in cell type identification, we  
277 performed clustering on CNDMs and computed the adjusted random index (ARI) for  
278 each dataset based on the background truth (File S1 Note 5). As shown in **Table 1** and  
279 Figure S4, CNDMs perform obviously better than GEM on all datasets, either without  
280 or with dimension reduction with t-SNE. These provide a strong support of the notion  
281 that the CCSN-transformed network data are highly informative for characterizing  
282 single cell populations. Interestingly, when further compared to NDM, CNDMs also  
283 show a good performance (**Table 2** and Figure S5).

284 To further evaluate CCSN for larger datasets, the Tabula Muris droplet1 dataset [41]

285 comprising more than 20,000 cells from three tissues (bladder, trachea, and spleen)  
286 were tested. The Seurat package was used to perform dimension reduction and  
287 clustering analysis on the CNDM [31]. The cells are clearly segregated into three  
288 dominant groups on the t-SNE map, which are largely defined by their cell origins (ARI  
289 = 0.73 and Figure S6). This indicates that CCSN can be effectively extended to larger  
290 datasets in addition to the relatively small gold standard datasets benchmarked above.

### 291 **CCSN reveals network structure and dynamics on a single cell basis**

292 In this paper, we apply CCSN to Wang dataset [39], which comes from a study of neural  
293 progenitor cells (NPCs) that differentiate into mature neurons. The dataset contains six  
294 time points over a 30-day period.

295 The CSN and CCSN are performed on a single cell (Day 0, RHB1742\_d0) using  
296 195 transcription factors which are differentially expressed across all the cell  
297 subpopulations and all time points. In CCSN, two genes (*HMGB1* and *SOX11*) of high  
298 coefficients of variation (CV) are chosen as the conditional genes. The results (**Figure**  
299 **3A**) illustrate that the network of CCSN are much sparser than the network of CSN.  
300 There are three modules in the CCSN, while there is only one dense network in the  
301 CSN. Furthermore, three hub genes are obtained in three modules in CCSN. One of the  
302 hub genes is *ASCL1* which plays an important role in neural development [13, 43]. Thus,  
303 by removing indirect associations, CCSN can extract a more informative network  
304 structure than CSN, which could improve the characterization of key regulatory factors  
305 in individual cells.

306 CCSN also reveals the network dynamics over the differentiation trajectory. As  
307 illustrated in Figure 3B, a core neural differentiation network composed of eight  
308 regulatory genes is dynamically modulated through the temporal progression of NPC  
309 differentiation. At day 0, the associations among these genes are the strongest,

310 consistent with the high potency of progenitor cells. As NPC differentiates, the network  
311 becomes much sparser, suggesting more specified cell fates. In addition, when  
312 constructing CCSN from all genes, the degrees of *MEIS2*, *PBX1* and *POU3F2* are also  
313 larger in day 0 and quickly decreases afterwards (Figure 3C), indicating that these genes  
314 are highly connected with other genes in NPCs, consistent with their known important  
315 roles in early differentiation of neural progenitor cells [39].

316 Both theoretically and computationally, CCSN can also construct a gene-gene  
317 network for a single bulk RNA-seq sample, in addition to a single cell. To validate this  
318 biologically, we apply CCSN to the TCGA lung adenocarcinoma (LUAD) RNA-seq  
319 dataset. The t-SNE plot based on CNDM reveals two obvious clusters, which  
320 respectively corresponding to normal adjacent lung tissues and lung tumors (Figure  
321 S8A), supporting the effective application of CCSN to bulk RNA-seq data as well.  
322 Moreover, the EGFR pathway, a well-known oncogenic driver pathway for LUAD [44-  
323 46], is densely connected in tumor samples but not in benign tissues, as illustrated in  
324 the representative single-sample EGFR networks (Figure S8 B), and the CCSN degrees  
325 of EGF and EGFR in each normal and tumor samples (Figure S8 C). These data  
326 demonstrate that CCSN well extends to single sample bulk RNA-seq data analysis and  
327 uncovers important biological connections related to disease states.

### 328 **CCSN-based network flow entropy analysis**

329 To quantify the differentiation state of cells, we further develop a new method “network  
330 flow entropy” (NFE) to estimate the differentiation potency of cells by exploiting the  
331 gene-gene network constructed by CCSN.

332 To assess the performance of NFE, we apply it to two datasets. In Wang dataset [39],  
333 there are 484 cells with 6 stages (day 0, day 1, day 5, day 7, day 10, day 30) and the  
334 CCSNs with one conditional gene are used to compute the network flow entropy. We

335 compared NPC (at Day 0 and Day 1) with mature neurons (at Day 30) (**Figure 4A**). In  
336 Yang dataset [38], we compared the cells in day 10 with day 17 in differentiation of  
337 mouse hepatoblasts (Figure 4B) and the CSN was used to compute the network flow  
338 entropy. In both datasets, NFE assigns significantly higher scores to the progenitors  
339 than the differentiated cells (one-sided Wilcoxon rank sum test, p-value =  $3.756e-19$  in  
340 Yang dataset, p-value =  $2.062e-12$  on Wang dataset).

341 To further validate NFE, we generated a three-dimensional representation of the  
342 cell-lineage trajectory for the Wang dataset. In the time-course differentiation  
343 experiment of NPCs into neurons [39], NFE correctly predicted a gradual decrease in  
344 differentiation potency (**Figure 5**). Therefore, NFE is effectively applicable to single  
345 cell differentiation studies and highly predictive of developmental states and directions.  
346

## 347 **Discussion**

348 Estimating functional gene networks from noisy single cell data has been a challenging  
349 task. Motivated by network-based data transformation, we have previously developed  
350 CSN to uncover cell-specific networks and successfully applied it to extract  
351 biologically important gene interactions. However, CSN does not distinguish direct and  
352 indirect associations and thus suffers from the so-called overestimation problem. In this  
353 study, we propose a more sophisticated approach termed CCSN, which constructs  
354 direct gene-gene associations (network) of each cell by eliminating false connections  
355 introduced by indirect effects.

356 CCSN can transform GEM to CNDM for downstream dimension reduction and  
357 clustering analysis. These allow us to identify cell populations, generally better than  
358 GEM in the datasets tested above. In addition, CCSN also shows good performance  
359 when compared to CSN. Moreover, we can construct one direct gene-gene association

360 network by one cell based on CCSN. From the networks of the individual cells, we can  
361 obtain the dynamically changed networks. In Figure 3C, the CCSNs of these cells  
362 dynamically changed at different time points, and the network at day 0 shows the  
363 strongest associations. Moreover, the hub genes of the networks constructed by CCSN  
364 method may play an important role in biological processes. In Figure 3A, the hub genes  
365 of three modules in the network constructed by CCSN play a vital role in neural  
366 development. These clearly demonstrate the advantages of CCSN. Furthermore, we  
367 develop a new NFE index which can accurately estimate the differentiation potency of  
368 a single cell. And the results show that NFE performs well in distinguishing various  
369 cells of differential potency.

370 Nonetheless, the computational cost of CCSN generally increases by  $G$  times  
371 comparing with the original CSN due to  $G$  conditional genes. Thus, a parallel  
372 computation scheme is desired to reduce the computation time. Also, CCSN is not  
373 designed to construct the causal gene association networks, and the directions of the  
374 gene associations cannot be obtained. These could be our future research topics.

## 375 **Author Contributions**

376 L.L. and H.D. developed the methodology. L.L. executed the experiments. Z.Y.F.  
377 helped the experiments and provided technical support. L.L., H.D., Z.Y.F. and L.N.C.  
378 wrote and revised the manuscript. L.N.C. and Z.Y.F. supervised the work and critically  
379 reviewed the paper. All authors have read and approved the final manuscript.

380

## 381 **Competing Interests**

382 The authors have declared no competing interests.

383



## 384 **Acknowledgements**

385 This work was supported by the National Key R&D Program of China (No.  
386 2017YFA0505500), National Natural Science Foundation of China (Nos. 31771476  
387 and 31930022), and Shanghai Municipal Science and Technology Major Project (No.  
388 2017SHZDZX01). We would like to acknowledge Dr. Tang Zeng for helpful  
389 discussions.

390

391

## 392 **References**

393 [1] Yan L, Yang M, Guo H, Yang L, Wu J, Li R, et al. Single-cell RNA-Seq profiling of human  
394 preimplantation embryos and embryonic stem cells. *Nat Struct Mol Biol* 2013;20:1131-9.

395 [2] Treutlein B, Brownfield DG, Wu AR, Neff NF, Mantalas GL, Espinoza FH, et al. Reconstructing  
396 lineage hierarchies of the distal lung epithelium using single-cell RNA-seq. *Nature* 2014;509:371-5.

397 [3] Zeisel A, Munoz-Manchado AB, Codeluppi S, Lonnerberg P, La Manno G, Jureus A, et al. Brain  
398 structure. Cell types in the mouse cortex and hippocampus revealed by single-cell RNA-seq. *Science*  
399 2015;347:1138-42.

400 [4] Fuzik J, Zeisel A, Mate Z, Calvigioni D, Yanagawa Y, Szabo G, et al. Integration of  
401 electrophysiological recordings with single-cell RNA-seq data identifies neuronal subtypes. *Nat*  
402 *Biotechnol* 2016;34:175-83.

403 [5] Scialdone A, Tanaka Y, Jawaid W, Moignard V, Wilson NK, Macaulay IC, et al. Resolving early  
404 mesoderm diversification through single-cell expression profiling. *Nature* 2016;535:289-93.

405 [6] Bendall SC, Davis KL, Amir el AD, Tadmor MD, Simonds EF, Chen TJ, et al. Single-cell trajectory  
406 detection uncovers progression and regulatory coordination in human B cell development. *Cell*  
407 2014;157:714-25.

408 [7] Nestorowa S, Hamey FK, Pijuan Sala B, Diamanti E, Shepherd M, Laurenti E, et al. A single-cell  
409 resolution map of mouse hematopoietic stem and progenitor cell differentiation. *Blood* 2016;128:e20-31.

410 [8] Woyke T, Doud DFR, Schulz F. The trajectory of microbial single-cell sequencing. *Nat Methods*  
411 2017;14:1045-54.

412 [9] Jaitin DA, Kenigsberg E, Keren-Shaul H, Elefant N, Paul F, Zaretzky I, et al. Massively Parallel  
413 Single-Cell RNA-Seq for Marker-Free Decomposition of Tissues into Cell Types. *Science* 2014;343:776-  
414 9.

415 [10] Shapiro E, Biezuner T, Linnarsson S. Single-cell sequencing-based technologies will revolutionize

- 416 whole-organism science. *Nature Reviews Genetics* 2013;14:618-30.
- 417 [11] Grun D, Lyubimova A, Kester L, Wiebrands K, Basak O, Sasaki N, et al. Single-cell messenger  
418 RNA sequencing reveals rare intestinal cell types. *Nature* 2015;525:251-5.
- 419 [12] Kuznetsov VA, Knott GD, Bonner RF. General statistics of stochastic process of gene expression in  
420 eukaryotic cells. *Genetics* 2002;161:1321-32.
- 421 [13] Kim JK, Marioni JC. Inferring the kinetics of stochastic gene expression from single-cell RNA-  
422 sequencing data. *Genome Biol* 2013;14:R7.
- 423 [14] Kharchenko PV, Silberstein L, Scadden DT. Bayesian approach to single-cell differential expression  
424 analysis. *Nature Methods* 2014;11:740-U184.
- 425 [15] Buettner F, Natarajan KN, Casale FP, Proserpio V, Scialdone A, Theis FJ, et al. Computational  
426 analysis of cell-to-cell heterogeneity in single-cell RNA-sequencing data reveals hidden subpopulations  
427 of cells. *Nat Biotechnol* 2015;33:155-60.
- 428 [16] Daigle BJ, Soltani M, Petzold LR, Singh A. Inferring single-cell gene expression mechanisms using  
429 stochastic simulation. *Bioinformatics* 2015;31:1428-35.
- 430 [17] Vu TN, Wills QF, Kalari KR, Niu NF, Wang LW, Rantalainen M, et al. Beta-Poisson model for  
431 single-cell RNA-seq data analyses. *Bioinformatics* 2016;32:2128-35.
- 432 [18] Tang H, Zeng T, Chen L. High-Order Correlation Integration for Single-Cell or Bulk RNA-seq Data  
433 Analysis. *Front Genet* 2019;10:371.
- 434 [19] Jiang H, Sohn LL, Huang H, Chen L. Single cell clustering based on cell-pair differentiability  
435 correlation and variance analysis. *Bioinformatics* 2018;34:3684-94.
- 436 [20] Kiselev VY, Kirschner K, Schaub MT, Andrews T, Yiu A, Chandra T, et al. SC3: consensus  
437 clustering of single-cell RNA-seq data. *Nat Methods* 2017;14:483-6.
- 438 [21] Wang B, Zhu J, Pierson E, Ramazzotti D, Batzoglou S. Visualization and analysis of single-cell  
439 RNA-seq data by kernel-based similarity learning. *Nat Methods* 2017;14:414-6.
- 440 [22] Huang M, Wang J, Torre E, Dueck H, Shaffer S, Bonasio R, et al. SAVER: gene expression recovery  
441 for single-cell RNA sequencing. *Nat Methods* 2018;15:539-42.
- 442 [23] Li WV, Li JJ. An accurate and robust imputation method scImpute for single-cell RNA-seq data.  
443 *Nat Commun* 2018;9:997.
- 444 [24] van Dijk D, Sharma R, Nainys J, Yim K, Kathail P, Carr AJ, et al. Recovering Gene Interactions  
445 from Single-Cell Data Using Data Diffusion. *Cell* 2018;174:716+.
- 446 [25] Gong WM, Kwak IY, Pota P, Koyano-Nakagawa N, Garry DJ. DrImpute: imputing dropout events  
447 in single cell RNA sequencing data. *Bmc Bioinformatics* 2018;19.
- 448 [26] Talwar D, Mongia A, Sengupta D, Majumdar A. AutoImpute: Autoencoder based imputation of  
449 single-cell RNA-seq data. *Scientific Reports* 2018;8.
- 450 [27] Dai H, Li L, Zeng T, Chen L. Cell-specific network constructed by single-cell RNA sequencing data.  
451 *Nucleic Acids Res* 2019.
- 452 [28] Jolliffe IT, Cadima J. Principal component analysis: a review and recent developments. *Philos Trans*  
453 *A Math Phys Eng Sci* 2016;374:20150202.
- 454 [29] van der Maaten L, Hinton G. Visualizing Data using t-SNE. *Journal of Machine Learning Research*

- 455 2008;9:2579-605.
- 456 [30] Wang B, Ramazzotti D, De Sano L, Zhu J, Pierson E, Batzoglou S. SIMLR: A Tool for Large-Scale  
457 Genomic Analyses by Multi-Kernel Learning. *Proteomics* 2018;18.
- 458 [31] Stuart T, Butler A, Hoffman P, Hafemeister C, Papalexi E, Mauck WM, 3rd, et al. Comprehensive  
459 Integration of Single-Cell Data. *Cell* 2019;177:1888-902 e21.
- 460 [32] MacArthur BD, Lemischka IR. Statistical Mechanics of Pluripotency. *Cell* 2013;154:484-9.
- 461 [33] Stegle O, Teichmann SA, Marioni JC. Computational and analytical challenges in single-cell  
462 transcriptomics. *Nat Rev Genet* 2015;16:133-45.
- 463 [34] Teschendorff AE, Enver T. Single-cell entropy for accurate estimation of differentiation potency  
464 from a cell's transcriptome. *Nat Commun* 2017;8:15599.
- 465 [35] Kolodziejczyk AA, Kim JK, Tsang JC, Ilicic T, Henriksson J, Natarajan KN, et al. Single Cell RNA-  
466 Sequencing of Pluripotent States Unlocks Modular Transcriptional Variation. *Cell Stem Cell*  
467 2015;17:471-85.
- 468 [36] Chu LF, Leng N, Zhang J, Hou Z, Mamott D, Vereide DT, et al. Single-cell RNA-seq reveals novel  
469 regulators of human embryonic stem cell differentiation to definitive endoderm. *Genome Biol*  
470 2016;17:173.
- 471 [37] Kim KT, Lee HW, Lee HO, Song HJ, Jeong da E, Shin S, et al. Application of single-cell RNA  
472 sequencing in optimizing a combinatorial therapeutic strategy in metastatic renal cell carcinoma.  
473 *Genome Biol* 2016;17:80.
- 474 [38] Yang L, Wang WH, Qiu WL, Guo Z, Bi E, Xu CR. A single-cell transcriptomic analysis reveals  
475 precise pathways and regulatory mechanisms underlying hepatoblast differentiation. *Hepatology*  
476 2017;66:1387-401.
- 477 [39] Wang J, Jenjaroenpun P, Bhinge A, Angarica VE, Del Sol A, Nookaew I, et al. Single-cell gene  
478 expression analysis reveals regulators of distinct cell subpopulations among developing human neurons.  
479 *Genome Res* 2017;27:1783-94.
- 480 [40] Gokce O, Stanley GM, Treutlein B, Neff NF, Camp JG, Malenka RC, et al. Cellular Taxonomy of  
481 the Mouse Striatum as Revealed by Single-Cell RNA-Seq. *Cell Reports* 2016;16:1126-37.
- 482 [41] Tabula Muris C, Overall c, Logistical c, Organ c, processing, Library p, et al. Single-cell  
483 transcriptomics of 20 mouse organs creates a Tabula Muris. *Nature* 2018;562:367-72.
- 484 [42] Baglama J, Reichel L (2005), 'Augmented implicitly restarted Lanczos bidiagonalization methods',  
485 *Siam Journal on Scientific Computing*, pp. 19-42.
- 486 [43] Ming GL, Song H. Adult neurogenesis in the mammalian brain: significant answers and significant  
487 questions. *Neuron* 2011;70:687-702.
- 488 [44] Ohsaki Y, Tanno S, Fujita Y, Toyoshima E, Fujiuchi S, Nishigaki Y, et al. Epidermal growth factor  
489 receptor expression correlates with poor prognosis in non-small cell lung cancer patients with p53  
490 overexpression. *Oncol Rep* 2000;7:603-7.
- 491 [45] Nicholson RI, Gee JM, Harper ME. EGFR and cancer prognosis. *Eur J Cancer* 2001;37 Suppl 4:S9-  
492 15.
- 493 [46] Sharma SV, Bell DW, Settleman J, Haber DA. Epidermal growth factor receptor mutations in lung

494 cancer. Nat Rev Cancer 2007;7:169-81.

495

496

497

498

499

500

501

502

503

504

505

506

## 507 **Figure legends**

### 508 **Figure 1 Overview of CCSN**

509 The input data is gene expression matrix  $E_{m \times n}$  (The orange column represents the cell

510  $k$ ). (1) The normalized statistics  $\hat{\rho}_{xy|z}^{(k)}$  of each gene pair gene  $x$  and gene  $y$  given a

511 conditional gene  $z$  for each cell  $k$ .  $\hat{\rho}_{xy|z}^{(k)}$  can be used to measure the direct gene-gene

512 associations. (2) Hypothesis testing of the normalized statistic  $\hat{\rho}_{xy|z}^{(k)}$ . The significance

513 level of hypothesis testing is  $\alpha$  and  $\mathcal{N}_\alpha$  is the alpha quantile of the distribution. When

514  $\hat{\rho}_{xy|z}^{(k)} > \mathcal{N}_\alpha$ , gene  $x$  and gene  $y$  are conditionally independent given the gene  $z$  in cell

515  $k$ ,  $w_{xy|z}^{(k)} = 0$ , else  $w_{xy|z}^{(k)} = 1$ . (3) Constructing conditional cell-specific network for

516 each gene pair for cell  $k$  and for the conditional gene set  $\mathcal{Z} = \{z_1, z_2, \dots, z_G\}$ . (4)

517 Integrating the conditional cell-specific network of conditional gene set  $\mathcal{Z}$ . For each cell,

518 we repeat the steps (1) – (4). Finally, we get a conditional degree matrix *CNDM* which  
519 has the same dimension as gene expression matrix *E*. The *CNDM* can be used in  
520 clustering, visualization and differentiation potency analysis.

521

## 522 **Figure 2 CNDM for visualization of scRNA-seq data**

523 The datasets are dimensionally reduced by t-SNE and cell types are encoded by  
524 different colors.

525

## 526 **Figure 3 CCSN uncovers network topology and dynamics for single cells**

527 **A.** The cell specific network (CSN) and conditional cell specific network (CCSN) of  
528 the same single cell from the Wang dataset. The same genes are used in network  
529 construction. **B.** CCSNs of 8 core genes for representative single cells. **C.** CCSN  
530 degrees of *MEIS2*, *PBX1* and *POU3F2* along six time points of the neuronal  
531 differentiation.

## 532 **Figure 4 Network flow entropy analyses for differentiated cells and progenitors**

533 **A.** Network flow entropy between NPCs (at 0 and 1 day) and mature neurons (at 30  
534 day). **B.** Network flow entropy between cells at day 10 and day 17 during differentiation  
535 of mouse hepatoblasts. P-value is from one-sided Wilcoxon rank-sum test.

## 536 **Figure 5 The differentiation landscape of neural progenitor cells into mature 537 neurons**

538 The 3-dimensional plot shows the NFE of single cells gradually decrease along the  
539 differentiation time-course of neural progenitor cells (day 0) into mature neurons (day  
540 30). The z axis represents the NFE. The x axis and y axis are the two components of t-  
541 SNE.

542

## 543 **Tables**

544 **Table 1 The comparison of CNDM and GEM in clustering of scRNA-seq data**

545 *Note:* The performance of clustering is evaluated by ARI. Hierarchical (t-SNE) and k-  
546 means (t-SNE) indicates clustering after t-SNE.

547

548 **Table 2 The comparison of CNDM with NDM in clustering analysis**

549 *Note:* The performance of clustering is evaluated by ARI.

550

551 **Supplementary material**

552 **File S1 CCSN additional implementation details**

553 **Figure S1 Scatter diagram of the expression values of gene x, gene y and gene z**  
554 **for cell k**

555 (A) the red plot k represents the cell k and x axis, y axis and z axis represent the  
556 expression levels of gene x, gene y and gene z. gene z respectively. Gene z is set as  
557 the conditional gene. n is the number of cells in the dataset. (B) The two parallel light  
558 shadow planes  $P_x^1, P_x^2$ , where x-axis is orthogonal with two planes. The dots are  
559 contained in the space between the two planes are the neighbors of  $x_k$  and the  
560 number of the dots is  $n_x^{(k)}$ . (C) The two parallel light shadow planes  $P_y^1, P_y^2$ , where y-  
561 axis is orthogonal with two planes. The dots are contained in the space between the  
562 two planes are the neighbors of  $y_k$  and the number of the dots is  $n_y^{(k)}$ . (D) The two  
563 parallel light shadow planes  $P_z^1, P_z^2$ , where z-axis is paralleled with the two planes.  
564 The dots contained in the space between the two planes are the neighbors of  $z_k$ , and  
565 the number of the dots is  $n_z^{(k)}$ . (E) The intersection of the four parallel light shadow  
566 planes  $P_x^1, P_x^2, P_z^1, P_z^2$  is the space which is surrounded by the green lines. The  
567 number of dots which are contained in the space is  $n_{xz}^{(k)}$ . (F) The intersection of the

568 four parallel light shadow planes  $P_y^1, P_y^2, P_z^1, P_z^2$  is the space which is surrounded  
569 by the green lines. The number of dots which are contained in the space is  $n_{yz}^{(k)}$ . (G)  
570 The intersection of the six parallel shadow planes  $P_x^1, P_x^2, P_y^1, P_y^2, P_z^1, P_z^2$  is the  
571 space which is surrounded by the green lines. The number of dots which are contained  
572 in the space is  $n_{xyz}^{(k)}$ .

573

574 **Figure S2 The comparison of standard normal distribution and the distribution**  
575 **of  $\hat{\rho}_{xy|z}^{(k)}$**

576 The density function is calculated by kernel density estimation based on 20,000 plots,  
577 and  $n_x, n_y, n_z$  are equal to 0.2n. The gene x and gene y are conditional independent  
578 given gene z.

579

580 **Figure S3 Performance comparison of GEM and CNDM**

581 PCA was applied for visualization and different colors represent different cell types.

582

583 **Figure S4 The clustering performance of CNDM and GEM**

584 K-means, hierarchical clustering algorithm (HCA) and K-medoids were used for  
585 comparison. The data which was preprocessed by t-SNE was also performed to cluster.

586

587 **Figure S5 The clustering performance of CNDM and NDM**

588 K-means, hierarchical clustering algorithm (HCA) were used for comparison. The  
589 data which was preprocessed by t-SNE was also performed to cluster.

590

591

592 **Figure S6 Visualization of 23,321 cells by t-SNE**

593 Different colors represent different tissues.

594

595 **Figure S7 The clustering performance of CNDM with different parameters**

596

597 **Figure S8 CCSN analysis of TCGA-LUAD dataset**

598 A. t-SNE plots are used for visualization based on CCSN. The normal samples and  
599 tumor samples are represented by different colors. B. CCSNs of representative samples  
600 for 18 genes involved in the EGFR pathway. C. Conditional network degrees of EGF  
601 and EGGR in the normal samples and the tumor samples.

602

603 **Table S1 The running time of CCSN with different numbers of conditional**  
604 **genes**

605

606 **Table S2 Datasets used in this study**

607



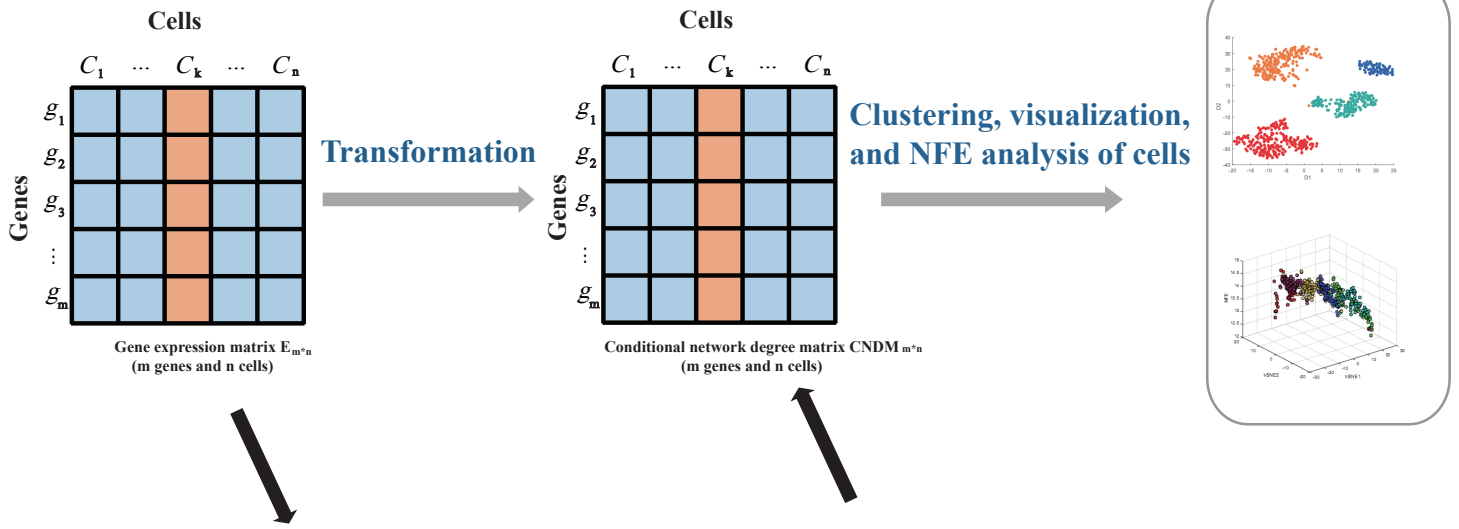

(1) The normalized statistics of gene x and gene y given the conditional gene z for each cell k

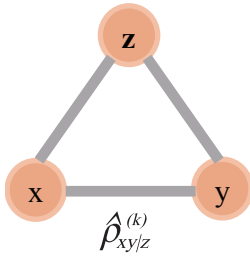

(2) Hypothesis testing of the normalized statistic  $\hat{\rho}_{xyz}^{(k)}$

The distribution of the normalized statistic

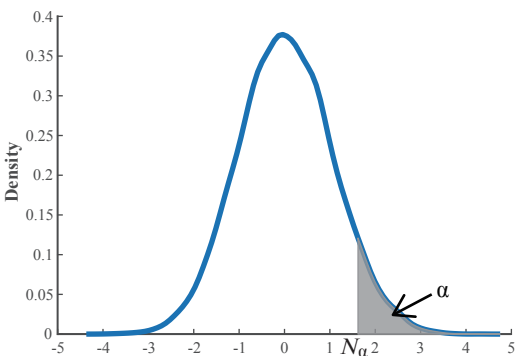

1.  $\hat{\rho}_{xyz}^{(k)} > N_{\alpha} : W_{xyz}^{(k)} = 0$
2.  $\hat{\rho}_{xyz}^{(k)} \leq N_{\alpha} : W_{xyz}^{(k)} = 1$

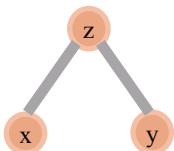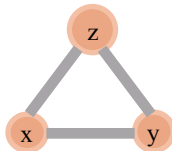

(4) Integrate the conditional cell-specific network of conditional gene set  $Z$

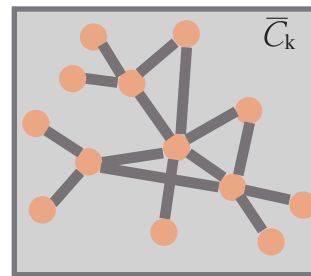

$$\bar{C}_k = \frac{1}{G} \sum_{g=1}^G C_{z_g}^{(k)}$$

(3) Construct conditional cell-specific network for gene pairs for cell k and genes in the conditional gene set  $Z = \{z_1, z_2, \dots, z_G\}$

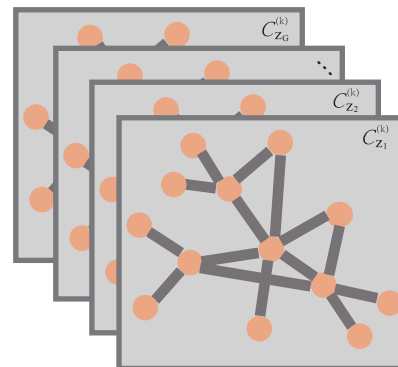

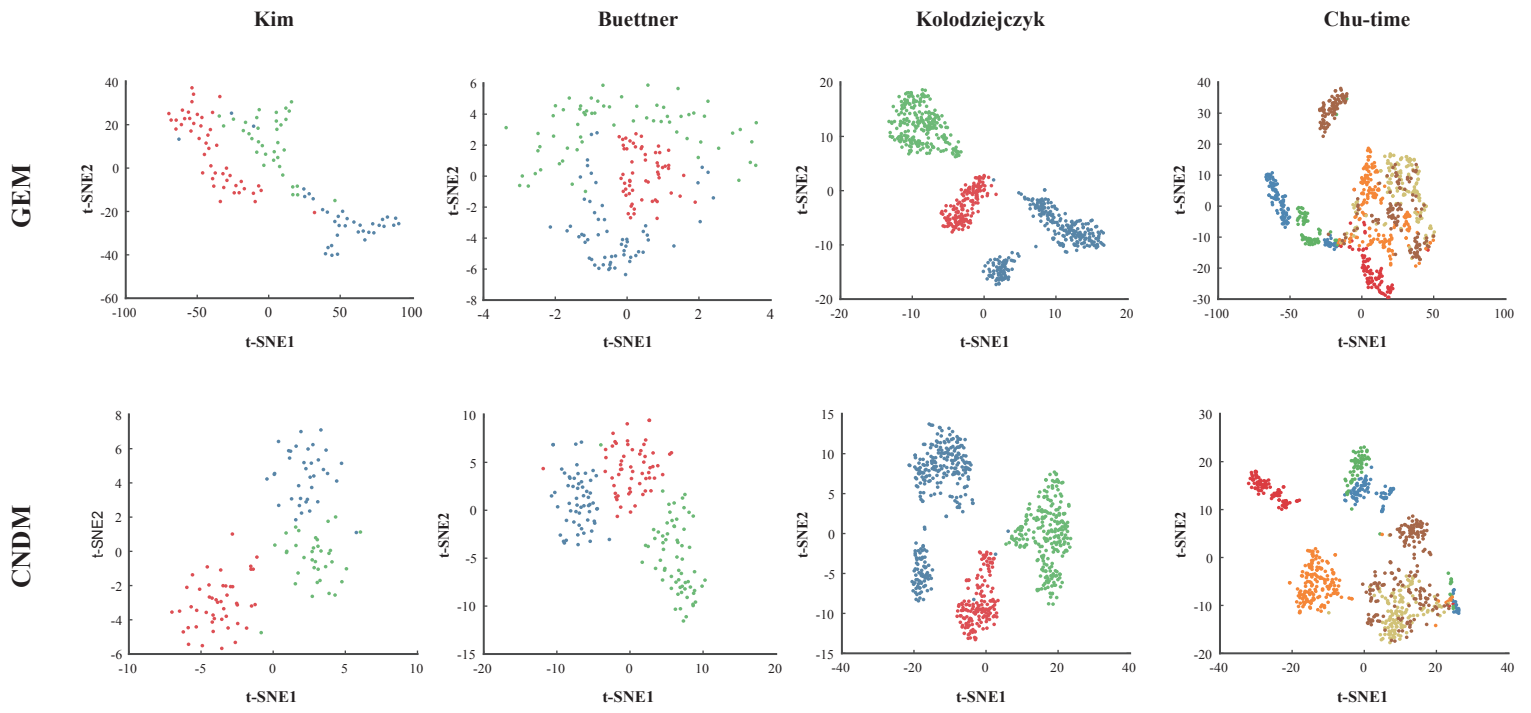

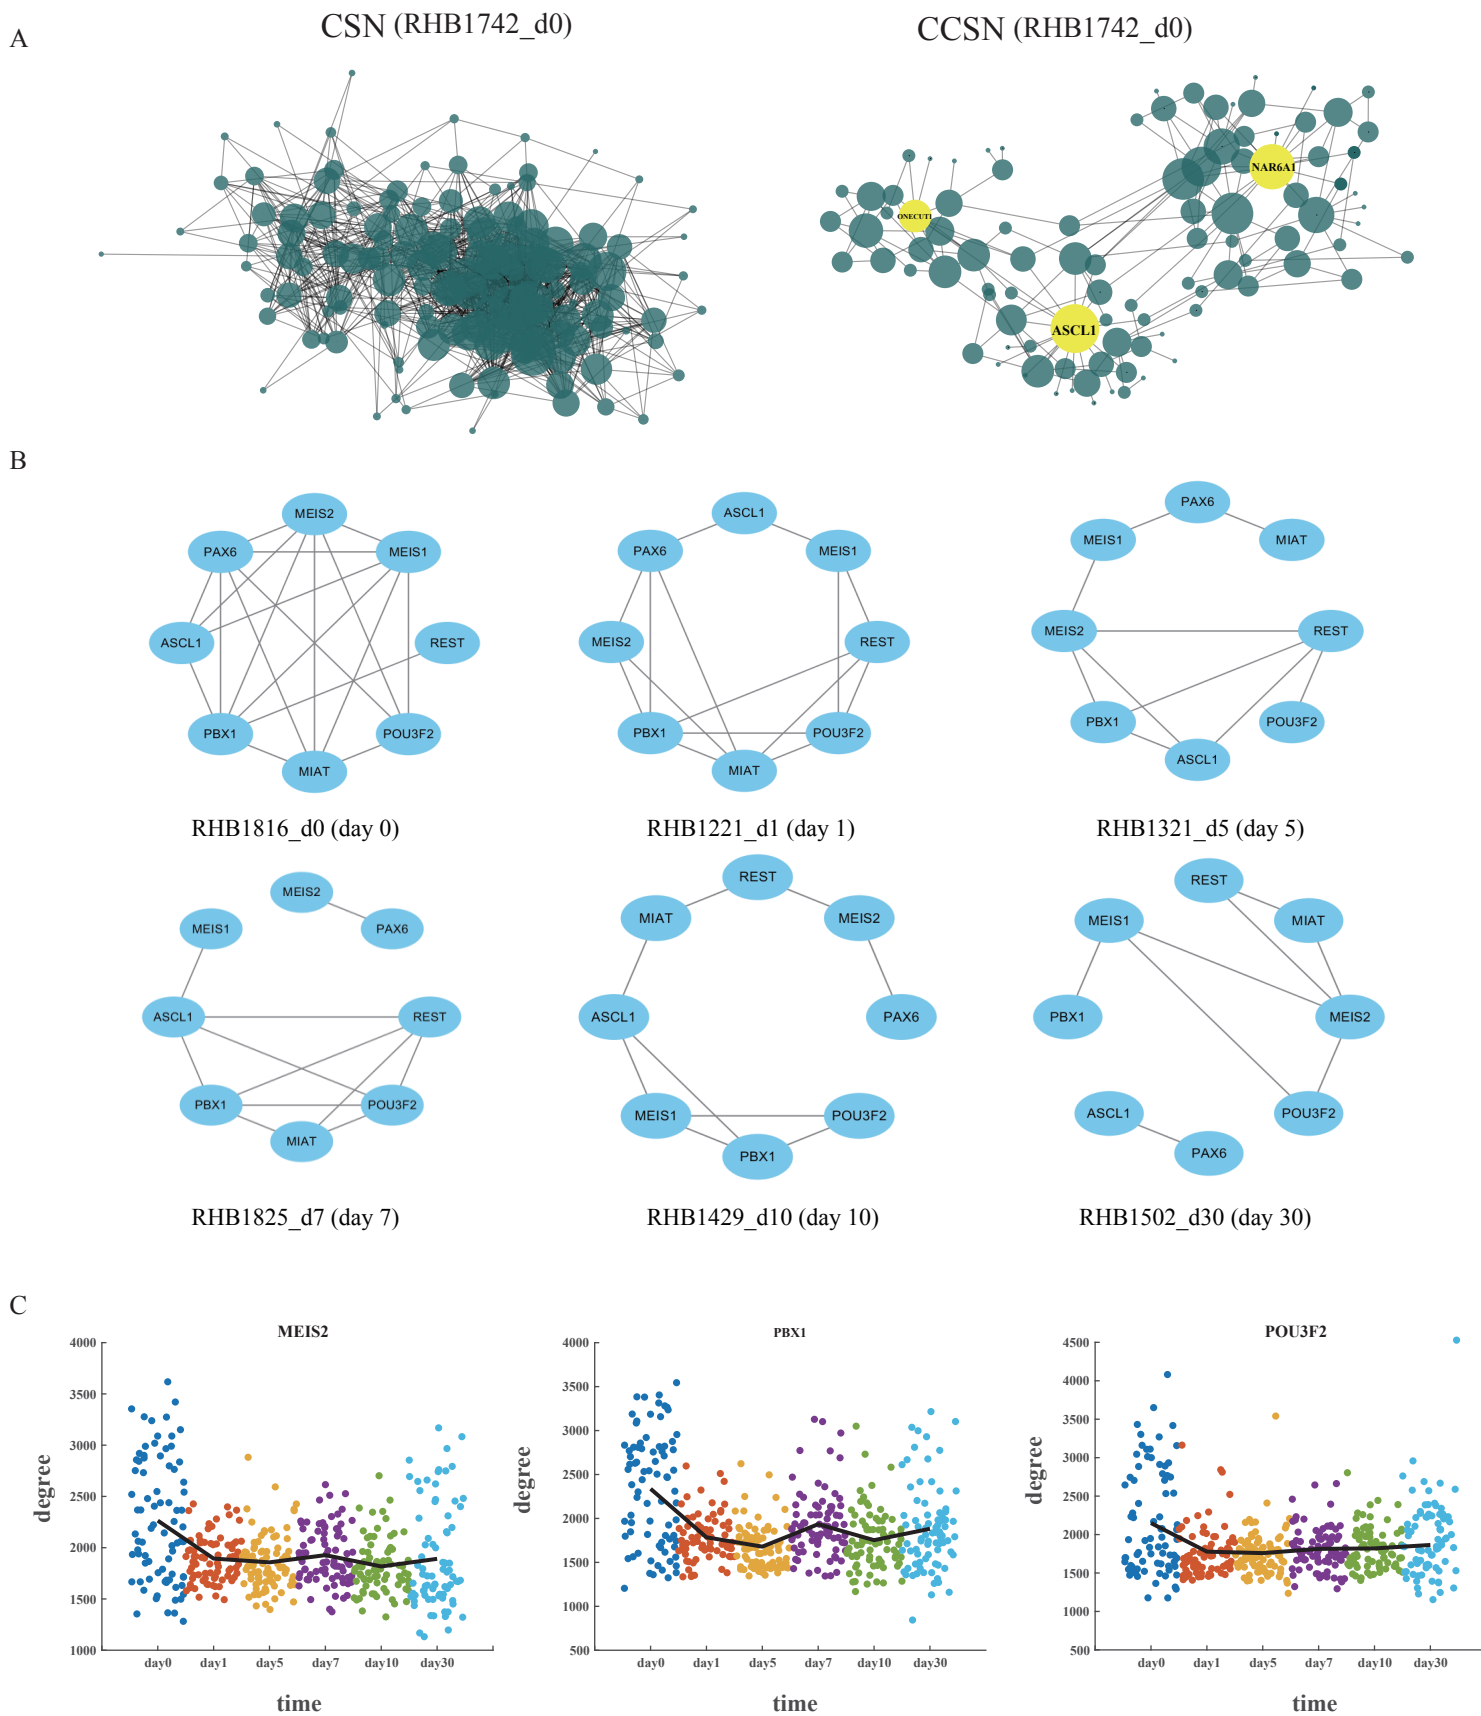

A

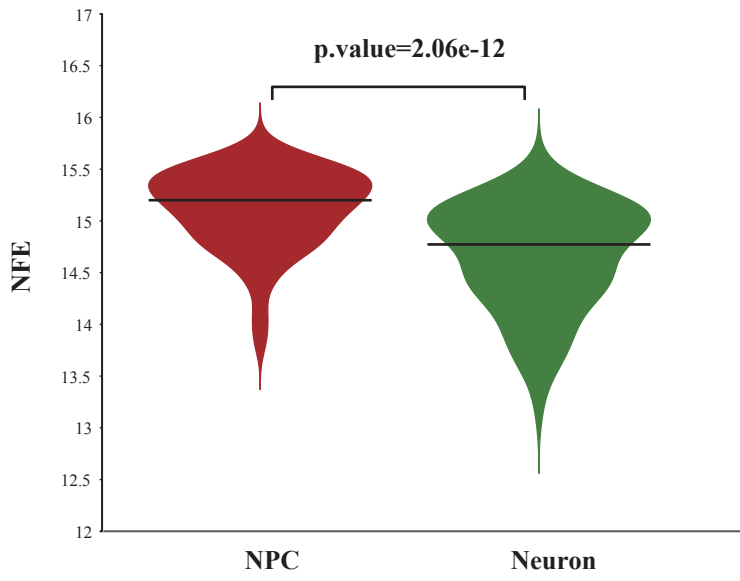

B

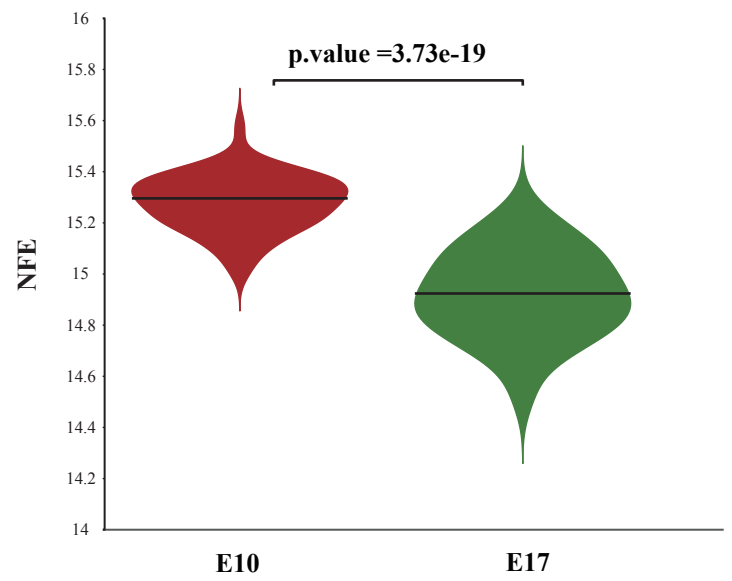

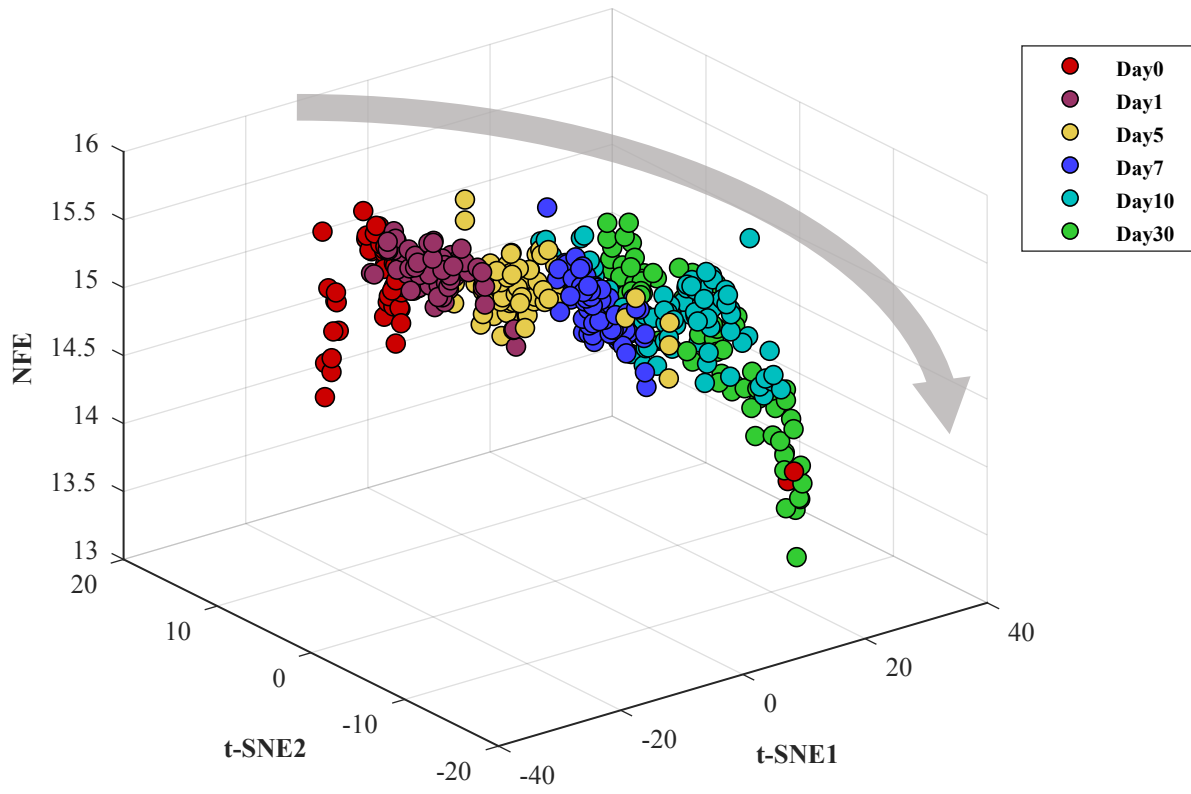

**Table 1** The comparison of CNDM and GEM in clustering of scRNA-seq data

|                      |             | Buettner    | Kolodziejczyk | Grokce      | Chu-time    | Chu-type    | Kim         |
|----------------------|-------------|-------------|---------------|-------------|-------------|-------------|-------------|
| K-means              | GEM         | 0.29        | 0.54          | 0.42        | 0.17        | 0.22        | 0.20        |
|                      | <b>CNDM</b> | <b>0.87</b> | <b>0.85</b>   | <b>0.75</b> | <b>0.45</b> | <b>0.57</b> | <b>0.81</b> |
| Hierarchical         | GEM         | 0.32        | 0.49          | 0.47        | 0.22        | 0.22        | 0.12        |
|                      | <b>CNDM</b> | <b>0.73</b> | <b>0.65</b>   | <b>0.92</b> | <b>0.47</b> | <b>0.61</b> | <b>0.77</b> |
| K-means (t-SNE)      | GEM         | 0.41        | 0.87          | 0.43        | 0.33        | 0.55        | 0.53        |
|                      | <b>CNDM</b> | <b>0.95</b> | <b>0.91</b>   | 0.36        | 0.56        | <b>0.70</b> | <b>0.93</b> |
| Hierarchical (t-SNE) | GEM         | 0.55        | 0.99          | 0.50        | 0.39        | 0.67        | 0.73        |
|                      | <b>CNDM</b> | <b>0.95</b> | 0.99          | 0.39        | <b>0.61</b> | <b>0.80</b> | <b>0.95</b> |
| K-medoids            | GEM         | 0.23        | 0.29          | 0.40        | 0.33        | 0.33        | 0.79        |
|                      | <b>CNDM</b> | <b>0.53</b> | <b>0.63</b>   | <b>0.81</b> | 0.17        | <b>0.38</b> | <b>0.61</b> |
| SC3                  | GEM         | 0.89        | 1             | 0.56        | 0.66        | 0.78        | 0.89        |
|                      | <b>CNDM</b> | <b>0.98</b> | 0.72          | <b>0.72</b> | 0.63        | <b>0.98</b> | <b>0.96</b> |
| SIMLR                | GEM         | 0.89        | 0.49          | 0.43        | 0.30        | 0.48        | 0.38        |
|                      | <b>CNDM</b> | 0.63        | <b>0.52</b>   | <b>0.85</b> | <b>0.58</b> | <b>0.54</b> | <b>0.95</b> |
| Seurat               | GEM         | 0.67        | 0.43          | 0.35        | 0.52        | 0.52        | 0.41        |
|                      | <b>CNDM</b> | <b>0.90</b> | <b>0.56</b>   | 0.32        | <b>0.56</b> | <b>0.69</b> | <b>0.84</b> |

*Note:* The performance of clustering is evaluated by adjusted random index (ARI). Hierarchical (t-SNE) and k-means (t-SNE) represent that the clustering analysis is performed after dimension-reduction by t-SNE

**Table 2 The comparison of CNDM with NDM in clustering analysis**

|                      |             | Buettner    | Kim         | Wang        | Grokce      | Tabula Muris<br>(Aorta) | Tabula Muris<br>(Limb Muscle) |
|----------------------|-------------|-------------|-------------|-------------|-------------|-------------------------|-------------------------------|
| K-means              | NDM         | 0.50        | 0.50        | 0.30        | 0.79        | 0.21                    | 0.58                          |
|                      | <b>CNDM</b> | <b>0.87</b> | <b>0.81</b> | <b>0.45</b> | <b>0.75</b> | <b>0.63</b>             | <b>0.66</b>                   |
| Hierarchical         | NDM         | 0.69        | 0.59        | 0.38        | 0.95        | 0.12                    | 0.65                          |
|                      | <b>CNDM</b> | <b>0.73</b> | <b>0.77</b> | <b>0.45</b> | <b>0.92</b> | <b>0.75</b>             | <b>0.76</b>                   |
| K-means (t-SNE)      | NDM         | 0.83        | 0.84        | 0.61        | 0.38        | 0.46                    | 0.62                          |
|                      | <b>CNDM</b> | <b>0.95</b> | <b>0.93</b> | <b>0.67</b> | 0.36        | <b>0.61</b>             | <b>0.65</b>                   |
| Hierarchical (t-SNE) | NDM         | 0.89        | <b>0.98</b> | 0.58        | 0.47        | 0.50                    | 0.66                          |
|                      | <b>CNDM</b> | <b>0.95</b> | <b>0.95</b> | <b>0.72</b> | 0.39        | <b>0.50</b>             | 0.66                          |
| K-medoids            | NDM         | 0.26        | 0.49        | 0.31        | 0.60        | 0.35                    | 0.14                          |
|                      | <b>CNDM</b> | <b>0.53</b> | <b>0.61</b> | 0.21        | <b>0.81</b> | <b>0.53</b>             | <b>0.39</b>                   |
| SC3                  | NDM         | 0.67        | 1           | 0.70        | 0.45        | 0.29                    | 0.66                          |
|                      | <b>CNDM</b> | <b>0.98</b> | 0.96        | <b>0.86</b> | <b>0.72</b> | <b>0.73</b>             | <b>0.76</b>                   |
| SIMLR                | NDM         | 0.64        | 0.75        | 0.29        | 0.74        | 0.40                    | 0.60                          |
|                      | <b>CNDM</b> | 0.63        | <b>0.95</b> | <b>0.60</b> | <b>0.85</b> | <b>0.70</b>             | <b>0.71</b>                   |
| Seurat               | NDM         | 0.82        | 0.97        | 0.59        | 0.44        | 0.45                    | 0.66                          |
|                      | <b>CNDM</b> | <b>0.90</b> | 0.84        | 0.59        | 0.32        | <b>0.76</b>             | <b>0.75</b>                   |

*Note:* The performance of clustering is evaluated by adjusted random index (ARI). Hierarchical (t-SNE) and k-means (t-SNE) represent that the clustering analysis is performed after dimension-reduction by t-SNE
